# Supplementary material for: Comparative studies on the interaction of anticancer drug irinotecan with dsDNA and ssDNA
Source: Royal Society of Chemistry journal article supplement (doi:10.1039/c8ra03231a), 2018-01-01
Supplement: c8ra03231a1.pdf [file c8ra03231a1.pdf]

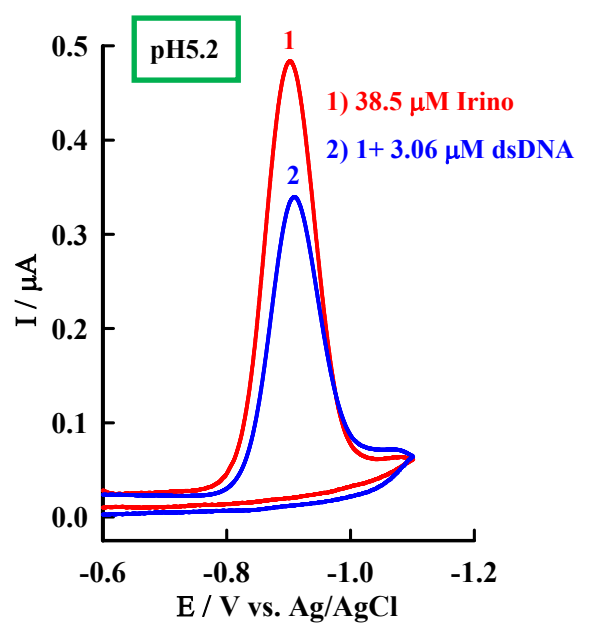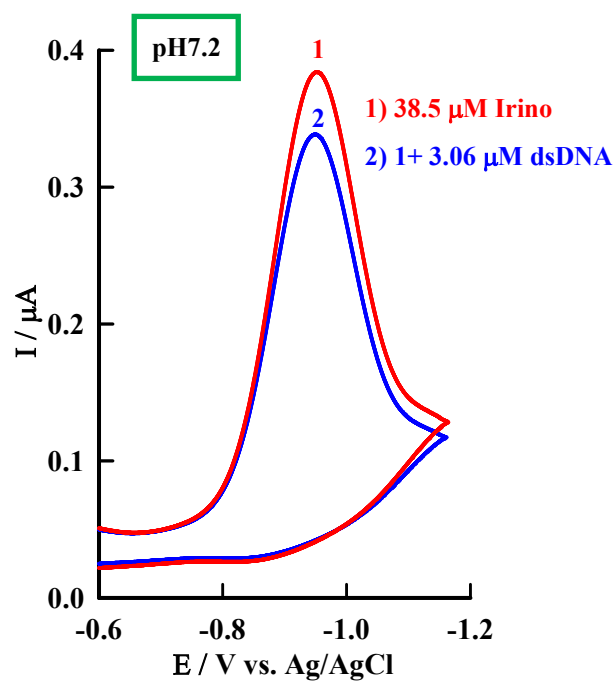

**Fig.S1:** CV of 38.5  $\mu\text{M}$  Irino at HMDE in absence (1) and presence of 3.06  $\mu\text{M}$  dsDNA (2) at pH5.2 and 7.2. Adsorption potential, -0.2V; adsorption time, 60 s; and scan rate, 120  $\text{mVs}^{-1}$ .
